# Supplementary material
Source: publisher figshare collection journal article supplement (https://tandf.figshare.com/articles/dataset/_/12005259)
Supplement: Supplementary file 2 [file 1]

**Verrastro et al. Supplementary Tables for  
“The effect of HOCl-induced modifications on PTEN structure and function”**

**Supplementary Table 1.** Identification and quantification of PTEN oxidative modifications in the PTEN-GST intact band and aggregates following HOCl oxidizing treatment.

| Peptide sequence <sup>a</sup>                  | Enzyme <sup>b</sup> | Mod <sup>c</sup>         | Fraction detected <sup>d</sup> |         | HOCl:PTEN-GST molar ratios |          |               |                    |                   |
|------------------------------------------------|---------------------|--------------------------|--------------------------------|---------|----------------------------|----------|---------------|--------------------|-------------------|
|                                                |                     |                          |                                |         | 15:1                       | 30:1     | 60:1          | 150:1              | 300:1             |
| TVEEPSNPEA<br>SSSTSVTPDV<br>SDNEPDH <b>Y</b> R | Trypsin             | <b>Tyr377<br/>CHLOR*</b> | Aggregates                     | FC      | 0                          | Infinity | Infinity      | Infinity           | Infinity          |
|                                                |                     |                          |                                | p-value | >0.9999                    | >0.9999  | 0.6843        | 0.9908             | <b>0.0417</b>     |
|                                                |                     |                          |                                | %       | 0.00                       | 0.00     | 0.00          | 0.01               | 0.29              |
| FM <b>Y</b> FEFPQPL<br>PVCGLDIK                | Trypsin             | <b>Tyr240<br/>OX*</b>    | Aggregates                     | FC      | 10.06                      | 47.11    | 84.95         | 323.25             | <b>1031.21</b>    |
|                                                |                     |                          |                                | p-value | 0.9997                     | 0.3521   | <b>0.0196</b> | <b>0.0001</b>      | <b>0.0001</b>     |
|                                                |                     |                          |                                | %       | 0.07                       | 0.60     | 1.20          | 2.27               | 7.24              |
| IYNL <b>C</b> AERHY<br>DTAK                    | LysC                | <b>Cys71<br/>TRIOX*</b>  | PTEN-GST<br>band               | FC      | 4.16                       | 8.04     | 70.11         | 310.14             | <b>405.21</b>     |
|                                                |                     |                          |                                | p-value | > 0.9999                   | 0.9998   | 0.5733        | <b>0.0003</b>      | <b>&lt;0.0001</b> |
|                                                |                     |                          |                                | %       | 0.12                       | 0.24     | 2.08          | 9.20               | 12.02             |
| FM <b>Y</b> FEFPQPL<br>PVCGLDIKVEFF<br>HK      | LysC                | <b>Tyr240<br/>OX*</b>    | PTEN-GST<br>band               | FC      | 4.20                       | 5.67     | 28.18         | 197.52             | <b>226.35</b>     |
|                                                |                     |                          |                                | p-value | > 0.9999                   | 0.9999   | 0.9868        | <b>0.0252</b>      | <b>0.0107</b>     |
|                                                |                     |                          |                                | %       | 0.20                       | 0.27     | 1.33          | 9.34               | 10.70             |
| ADNDKE <b>Y</b> LVL<br>TLTK                    | Trypsin             | <b>Tyr315<br/>CHLOR*</b> | PTEN-GST<br>band               | FC      | 1.22                       | 4.82     | 25.45         | 88.76              | <b>156.24</b>     |
|                                                |                     |                          |                                | p-value | > 0.9999                   | 0.9568   | <b>0.0087</b> | <b>&lt; 0.0001</b> | <b>0.0001</b>     |
|                                                |                     |                          |                                | %       | 0.07                       | 0.27     | 1.44          | 5.03               | 8.85              |
|                                                |                     |                          | Aggregates                     | FC      | 0.92                       | 0.86     | 0.80          | 3.66               | 3.56              |
|                                                |                     |                          |                                | p-value | 0.9999                     | 0.9985   | 0.9801        | <b>0.0131</b>      | <b>0.0164</b>     |
|                                                |                     |                          |                                | %       | 1.39                       | 1.21     | 2.06          | 5.52               | 5.38              |
| GRTGVMI <b>C</b> AY<br>LLHRGK                  | LysC                | <b>Cys136<br/>TRIOX*</b> | PTEN-GST<br>band               | FC      | 0.91                       | 1.22     | 11.59         | <b>132.57</b>      | 131.08            |
|                                                |                     |                          |                                | p-value | > 0.9999                   | > 0.9999 | 0.9958        | <b>0.0039</b>      | <b>0.0042</b>     |
|                                                |                     |                          |                                | %       | 0.12                       | 0.17     | 1.58          | 18.10              | 17.90             |
|                                                |                     |                          | Aggregates                     | FC      | 0.84                       | 0.90     | 1.48          | 2.08               | 2.47              |
|                                                |                     |                          |                                | p-value | 0.9381                     | 0.9874   | 0.2071        | <b>0.0023</b>      | <b>0.0002</b>     |
|                                                |                     |                          |                                | %       | 23.61                      | 25.04    | 41.39         | 58.32              | 69.00             |
| TVEEPSNPEA<br>SSSTSVTPDV<br>SDNEPDH <b>Y</b> R | Trypsin             | <b>Tyr377<br/>DICHL*</b> | Aggregates                     | FC      | 6.31                       | 9.78     | 15.99         | 41.92              | <b>71.31</b>      |
|                                                |                     |                          |                                | p-value | 0.9916                     | 0.6690   | 0.4131        | <b>0.0305</b>      | <b>0.0006</b>     |
|                                                |                     |                          |                                | %       | 0.92                       | 2.32     | 3.10          | 6.09               | 10.35             |
| FM <b>Y</b> FEFPQPL<br>PV <b>C</b> GLDIK       | Trypsin             | <b>Cys250<br/>TRIOX*</b> | PTEN-GST<br>band               | FC      | 1.20                       | 5.64     | 33.08         | <b>51.84</b>       | 38.82             |
|                                                |                     |                          |                                | p-value | > 0.9999                   | 0.9899   | <b>0.0449</b> | <b>0.0022</b>      | <b>0.0176</b>     |
|                                                |                     |                          |                                | %       | 1.60                       | 7.52     | 44.11         | 69.12              | 51.76             |
|                                                |                     |                          | Aggregates                     | FC      | 1.77                       | 2.26     | 3.66          | 13.20              | 16.48             |
|                                                |                     |                          |                                | p-value | 0.9674                     | 0.2470   | <b>0.0020</b> | <b>&lt; 0.0001</b> | <b>0.0001</b>     |
|                                                |                     |                          |                                | %       | 5.34                       | 11.02    | 22.54         | 39.74              | 49.61             |
| YQEDGFDLDL<br>TYIYPNIIA <b>M</b> GF<br>PAER    | Trypsin             | <b>Met35<br/>DIOX*</b>   | PTEN-GST<br>band               | FC      | 1.05                       | 1.07     | 1.98          | 14.78              | 20.67             |
|                                                |                     |                          |                                | p-value | > 0.9999                   | > 0.9999 | 0.9982        | <b>0.0059</b>      | <b>0.0003</b>     |
|                                                |                     |                          |                                | %       | 0.36                       | 0.37     | 0.69          | 5.12               | 7.16              |
|                                                |                     |                          | Aggregates                     | FC      | 5.11                       | 7.48     | 8.31          | 23.39              | <b>42.33</b>      |
|                                                |                     |                          |                                | p-value | 0.7291                     | 0.2585   | 0.1209        | <b>0.0003</b>      | <b>0.0001</b>     |
|                                                |                     |                          |                                | %       | 1.13                       | 1.84     | 2.24          | 5.18               | 9.37              |
| <b>M</b> FHFVWNTFF<br>IPGPEETSEK               | LysC                | <b>Met270<br/>OX*</b>    | PTEN-GST<br>band               | FC      | 0.27                       | 0.61     | 1.92          | <b>41.78</b>       | 27.76             |
|                                                |                     |                          |                                | p-value | 0.9999                     | > 0.9999 | 0.9999        | <b>0.0021</b>      | <b>0.0355</b>     |
|                                                |                     |                          |                                | %       | 0.10                       | 0.24     | 0.75          | 16.40              | 10.89             |
| AQEALDF <b>Y</b> GE<br>VRTRDK                  | LysC                | <b>Tyr155<br/>CHLOR*</b> | PTEN-GST<br>band               | FC      | 0.81                       | 1.28     | 1.71          | 20.14              | <b>24.67</b>      |
|                                                |                     |                          |                                | p-value | > 0.9999                   | > 0.9999 | 0.9998        | <b>0.0056</b>      | <b>0.0011</b>     |
|                                                |                     |                          |                                | %       | 0.02                       | 0.02     | 0.03          | 0.39               | 0.47              |
|                                                |                     |                          | Aggregates                     | FC      | 0.64                       | 0.84     | 1.65          | 3.21               | 2.28              |
|                                                |                     |                          |                                | p-value | 0.9864                     | 0.9997   | 0.864         | 0.0546             | 0.3753            |
|                                                |                     |                          |                                | %       | 0.59                       | 0.76     | 1.50          | 2.92               | 2.08              |

|                                    |         |                  |                  |         |          |          |         |          |          |
|------------------------------------|---------|------------------|------------------|---------|----------|----------|---------|----------|----------|
| AQEALDFYGE<br>VR                   | Trypsin | Tyr155<br>CHLOR* | PTEN-GST<br>band | FC      | 0.68     | 0.84     | 1.34    | 8.91     | 22.48    |
|                                    |         |                  | Aggregates       | p-value | 0.9997   | 0.9999   | 0.9997  | 0.0035   | < 0.0001 |
|                                    |         |                  |                  | %       | 0.32     | 0.39     | 0.62    | 4.14     | 10.45    |
|                                    |         |                  |                  | FC      | 0.91     | 0.77     | 0.57    | 1.52     | 3.42     |
|                                    |         |                  |                  | p-value | 0.9885   | 0.2165   | 0.2214  | 0.1095   | < 0.0001 |
|                                    |         |                  |                  | %       | 4.70     | 2.94     | 2.96    | 7.91     | 17.75    |
| TGVMICAYLLH<br>R                   | Trypsin | Cys136<br>DIOX*  | PTEN-GST<br>band | FC      | 2.68     | 3.71     | 12.40   | 15.39    | 3.63     |
|                                    |         |                  |                  | p-value | 0.9952   | 0.9628   | 0.1075  | 0.0352   | 0.9672   |
|                                    |         |                  |                  | %       | 0.45     | 0.62     | 2.06    | 2.56     | 0.60     |
| GRTGVMICAY<br>LLHRGK               | Lys C   | Met134<br>OX*    | PTEN-GST<br>band | FC      | 1.25     | 1.13     | 2.58    | 14.14    | 12.15    |
|                                    |         |                  |                  | p-value | 0.8655   | 0.8724   | 0.8247  | 0.0178   | 0.0065   |
|                                    |         |                  |                  | %       | 3.44     | 3.11     | 7.07    | 38.81    | 33.36    |
| TGVMICAYLLH<br>R                   | Trypsin | Cys136<br>TRIOX* | PTEN-GST<br>band | FC      | 0.87     | 2.31     | 5.75    | 8.41     | 7.85     |
|                                    |         |                  | Aggregates       | p-value | 0.9999   | 0.6478   | 0.0040  | 0.0001   | 0.0002   |
|                                    |         |                  |                  | %       | 9.22     | 24.41    | 60.64   | 88.72    | 82.82    |
|                                    |         |                  |                  | FC      | 1.00     | 1.01     | 1.04    | 1.11     | 1.12     |
|                                    |         |                  |                  | p-value | > 0.9999 | 0.5898   | 0.6901  | 0.0064   | 0.0048   |
|                                    |         |                  |                  | %       | 87.18    | 90.42    | 90.05   | 97.07    | 97.46    |
| MFHFWVNTFF<br>IPGPEETSEK           | Trypsin | His272<br>OX*    | Aggregates       | FC      | 1.46     | 1.68     | 1.68    | 4.13     | 5.47     |
|                                    |         |                  |                  | p-value | 0.8268   | 0.5526   | 0.6474  | 0.0002   | < 0.0001 |
|                                    |         |                  |                  | %       | 5.50     | 6.33     | 6.05    | 15.58    | 20.65    |
| TGVMICAYLLH<br>R                   | Trypsin | Met134<br>OX*    | PTEN-GST<br>band | FC      | 0.91     | 1.64     | 4.01    | 5.05     | 4.89     |
|                                    |         |                  | Aggregates       | p-value | 0.9998   | 0.7326   | 0.0013  | 0.0001   | 0.0002   |
|                                    |         |                  |                  | %       | 13.07    | 23.52    | 57.49   | 72.39    | 70.11    |
|                                    |         |                  |                  | FC      | 1.03     | 1.07     | 1.00    | 1.10     | 1.19     |
|                                    |         |                  |                  | p-value | 0.9779   | > 0.9999 | 0.5731  | 0.2360   | 0.0138   |
|                                    |         |                  |                  | %       | 65.55    | 63.97    | 68.18   | 70.35    | 75.81    |
| MFHFWVNTFF<br>IPGPEETSEK           | Trypsin | Met270<br>OX*    | PTEN-GST<br>band | FC      | 1.13     | 1.08     | 1.47    | 4.78     | 4.86     |
|                                    |         |                  | Aggregates       | p-value | 0.9985   | 0.9997   | 0.7986  | < 0.0001 | 0.0001   |
|                                    |         |                  |                  | %       | 17.90    | 17.09    | 23.27   | 75.51    | 76.89    |
|                                    |         |                  |                  | FC      | 1.12     | 1.17     | 1.23    | 1.22     | 1.05     |
|                                    |         |                  |                  | p-value | 0.3084   | 0.0172   | 0.0019  | 0.0227   | 0.8982   |
|                                    |         |                  |                  | %       | 58.51    | 64.31    | 68.59   | 63.78    | 55.06    |
| MFHFWVNTFF<br>IPGPEETSEK           | Trypsin | Trp274<br>OX*    | Aggregates       | FC      | 1.16     | 1.20     | 1.04    | 2.63     | 4.86     |
|                                    |         |                  |                  | p-value | 0.9926   | 0.9999   | 0.9997  | 0.0065   | < 0.0001 |
|                                    |         |                  |                  | %       | 8.88     | 7.98     | 7.00    | 20.10    | 37.18    |
| GRTGVMICAY<br>LLHRGK               | LysC    | Cys136<br>DIOX*  | PTEN-GST<br>band | FC      | 0.00     | 0.01     | 0.12    | 3.49     | 3.35     |
|                                    |         |                  |                  | p-value | 0.9952   | 0.9628   | 0.1075  | 0.0352   | 0.9672   |
|                                    |         |                  |                  | %       | 0.00     | 0.00     | 0.11    | 3.14     | 3.01     |
| MMFETIPMFS<br>GGTCNPQFVV<br>CQLK   | Trypsin | Met205<br>OX*    | PTEN-GST<br>band | FC      | 0.95     | 0.58     | 0.57    | 0.23     | 2.43     |
|                                    |         |                  | Aggregates       | p-value | > 0.9999 | 0.9985   | 0.9985  | 0.9799   | 0.8160   |
|                                    |         |                  |                  | %       | 0.03     | 0.02     | 0.02    | 0.01     | 0.09     |
|                                    |         |                  |                  | FC      | 2.02     | 2.64     | 2.72    | 3.41     | 3.22     |
|                                    |         |                  |                  | p-value | 0.5278   | 0.1311   | 0.0493  | 0.0254   | 0.0398   |
|                                    |         |                  |                  | %       | 22.71    | 30.59    | 35.29   | 38.40    | 36.30    |
| FMYFEFPQPL<br>PVCGLDIK             | Trypsin | Met239<br>OX*    | PTEN-GST<br>band | FC      | 1.09     | 1.26     | 1.80    | 3.18     | 3.34     |
|                                    |         |                  | Aggregates       | p-value | 0.9968   | 0.8082   | 0.0483  | < 0.0001 | 0.0001   |
|                                    |         |                  |                  | %       | 23.06    | 26.67    | 38.17   | 67.24    | 70.65    |
|                                    |         |                  |                  | FC      | 1.21     | 1.40     | 1.56    | 1.97     | 2.31     |
|                                    |         |                  |                  | p-value | 0.6932   | 0.0457   | 0.0354  | 0.0010   | < 0.0001 |
|                                    |         |                  |                  | %       | 35.0135  | 44.9442  | 45.7299 | 56.9346  | 66.5483  |
| YQEDGFDLDL<br>TYIYPNIIAMGF<br>PAER |         | Met 35<br>OX*    | PTEN-GST<br>band | FC      | 1.05     | 0.99     | 1.34    | 1.80     | 1.74     |
|                                    |         |                  |                  | p-value | 0.9942   | 0.9999   | 0.0950  | 0.0003   | 0.0006   |
|                                    |         |                  |                  | %       | 52.79    | 49.61    | 67.18   | 90.22    | 87.34    |

|                                           |         |                               |                  |         |          |        |          |        |        |
|-------------------------------------------|---------|-------------------------------|------------------|---------|----------|--------|----------|--------|--------|
|                                           | Trypsin |                               | Aggregates       | FC      | 0.92     | 0.99   | 1.06     | 1.11   | 1.24   |
|                                           |         |                               |                  | p-value | 0.9433   | 0.9819 | 0.9998   | 0.8455 | 0.2735 |
|                                           |         |                               |                  | %       | 62.35    | 72.23  | 66.89    | 75.57  | 84.18  |
| IYNLC <b>A</b> ER                         | Trypsin | <b>Cys71</b><br><b>TRIOX</b>  | PTEN-GST<br>band | FC      | 1.20     | 2.62   | 3.58     | 4.20   | 3.42   |
|                                           |         |                               |                  | p-value | 0.9998   | 0.7290 | 0.3467   | 0.1874 | 0.4026 |
|                                           |         |                               |                  | %       | 10.43    | 22.85  | 31.23    | 36.62  | 29.79  |
|                                           |         |                               | Aggregates       | FC      | 0.88     | 0.79   | 0.74     | 2.33   | 2.53   |
|                                           |         |                               |                  | p-value | 0.9998   | 0.9971 | 0.9725   | 0.3804 | 0.2653 |
|                                           |         |                               |                  | %       | 3.72     | 3.14   | 2.37     | 9.84   | 10.70  |
| TGV <b>M</b> ICAYLLH<br>R                 | Trypsin | Met134<br>DIOX                | PTEN-GST<br>band | FC      | 0.85     | 2.59   | 1.20     | 0.38   | 1.01   |
|                                           |         |                               |                  | p-value | 0.9997   | 0.1617 | 0.9985   | 0.8523 | >      |
|                                           |         |                               |                  | %       | 13.07    | 23.52  | 57.49    | 72.39  | 0.9999 |
| GRTGV <b>M</b> ICAY<br>LLHRGK             | LysC    | Met134<br>DIOX                | Aggregates       | FC      | 1.01     | 0.75   | 1.02     | 2.42   | 2.30   |
|                                           |         |                               |                  | p-value | > 0.9999 | 0.9811 | > 0.9999 | 0.0576 | 0.0866 |
|                                           |         |                               |                  | %       | 1.97     | 1.47   | 1.99     | 4.73   | 4.50   |
| <b>M</b> MFETIPMFS<br>GGTCNPQFVV<br>CQLK  | Trypsin | Met198<br>OX                  | PTEN-GST<br>band | FC      | 0.96     | 1.32   | 1.27     | 1.09   | 1.36   |
|                                           |         |                               |                  | p-value | 0.9999   | 0.8843 | 0.9388   | 0.9997 | 0.8426 |
|                                           |         |                               |                  | %       | 0.35     | 0.48   | 0.46     | 0.40   | 0.49   |
|                                           |         |                               | Aggregates       | FC      | 1.53     | 1.82   | 1.70     | 2.00   | 1.93   |
|                                           |         |                               |                  | p-value | 0.5635   | 0.3338 | 0.2112   | 0.1034 | 0.1328 |
|                                           |         |                               |                  | %       | 38.16    | 42.23  | 45.30    | 49.67  | 48.18  |
| <b>M</b> MFETIPMFS<br>GGTCNPQFVV<br>CQLK  | Trypsin | Met199<br>OX                  | PTEN-GST<br>band | FC      | 0.96     | 1.32   | 1.26     | 1.09   | 1.42   |
|                                           |         |                               |                  | p-value | 0.9999   | 0.8920 | 0.9484   | 0.9989 | 0.7536 |
|                                           |         |                               |                  | %       | 0.35     | 0.48   | 0.46     | 0.40   | 0.52   |
|                                           |         |                               | Aggregates       | FC      | 1.57     | 1.93   | 1.63     | 1.86   | 1.92   |
|                                           |         |                               |                  | p-value | 0.5032   | 0.6319 | 0.1596   | 0.5086 | 0.4257 |
|                                           |         |                               |                  | %       | 30.82    | 31.98  | 33.18    | 36.44  | 37.67  |
| MMFETIP <b>M</b> FS<br>GGTCNPQFVV<br>CQLK | Trypsin | Pro204<br>OX                  | PTEN-GST<br>band | FC      | 1.13     | 1.39   | 1.37     | 0.53   | 0.70   |
|                                           |         |                               |                  | p-value | 0.9910   | 0.6105 | 0.6534   | 0.4490 | 0.7928 |
|                                           |         |                               |                  | %       | 33.36    | 41.09  | 40.49    | 15.50  | 20.54  |
|                                           |         |                               | Aggregates       | FC      | 0.94     | 0.87   | 0.97     | 0.88   | 0.97   |
|                                           |         |                               |                  | p-value | 0.9965   | 0.9998 | 0.9631   | 0.9543 | 0.9997 |
|                                           |         |                               |                  | %       | 29.24    | 30.40  | 34.63    | 27.57  | 30.16  |
| MMFETIP <b>M</b> FS<br>GGTCNPQFVV<br>CQLK | Trypsin | Met205<br>DIOX                | PTEN-GST<br>band | FC      | 1.10     | 0.63   | 0.37     | 0.39   | 0.85   |
|                                           |         |                               |                  | p-value | 0.9998   | 0.9644 | 0.7835   | 0.8006 | 0.9996 |
|                                           |         |                               |                  | %       | 0.09     | 0.05   | 0.03     | 0.03   | 0.07   |
| VKI <b>Y</b> SSNSGPT<br>R                 | Trypsin | Tyr225<br>CHLOR               | Aggregates       | FC      | 0.99     | 0.96   | 1.14     | 1.35   | 1.40   |
|                                           |         |                               |                  | p-value | > 0.9999 | 0.8106 | 0.5871   | 0.1363 | 0.0780 |
|                                           |         |                               |                  | %       | 67.54    | 77.73  | 81.32    | 91.78  | 95.16  |
| MFHFWVNTFF<br><b>I</b> PGEETSEK           | Trypsin | Pro281<br>OX                  | PTEN-GST<br>band | FC      | 0.37     | 0.77   | 0.65     | 0.00   | 0.00   |
|                                           |         |                               |                  | p-value | 0.8137   | 0.9960 | 0.9770   | 0.4673 | 0.4673 |
|                                           |         |                               |                  | %       | 0.12     | 0.25   | 0.21     | 0.00   | 0.00   |
| <b>Y</b> SDTTDSDE<br>NEPDEDQHT<br>QITK    | Trypsin | <b>Tyr379</b><br><b>CHLOR</b> | Aggregates       | FC      | 7.37     | 12.40  | 14.83    | 170.06 | 459.86 |
|                                           |         |                               |                  | p-value | > 0.9999 | 0.9999 | 0.9107   | 0.8143 | 0.0944 |
|                                           |         |                               |                  | %       | 0.26     | 0.53   | 4.80     | 6.03   | 16.31  |
| GRTGV <b>M</b> ICAY<br>LLHRGK             | LysC    | <b>Met134</b><br><b>DIOX</b>  | Aggregates       | FC      | 1.01     | 0.75   | 1.02     | 2.42   | 2.30   |
|                                           |         |                               |                  | p-value | > 0.9999 | 0.9811 | > 0.9999 | 0.0576 | 0.0866 |
|                                           |         |                               |                  | %       | 1.97     | 1.47   | 1.99     | 4.73   | 4.50   |

a Peptide sequence obtained from the Mascot database search of LC-MS runs aligned on Progenesis Q1, carrying the modified residue (in red).

b Enzyme used for the digestion of

c Gel Fraction corresponding to the LC-MS run where the peptide was detected

d Modification type and position within the protein amino acid sequence

F.C = fold change relative to untreated control; p-value was returned by one-way ANOVA with Dunnett's multiple comparison test for each modification detected following relative quantification. % = average percentage abundance of the modification;

**Bold** indicates more than 2.5-maximum fold change in abundance of the modification in at least one HOCl to PTEN-GST molar ratio used; \* indicates modification with a statistically significant increase in abundance, and the significant p-values are highlighted in **bold red**. Infinity indicates FC values obtained when the abundance of the modification in the untreated control was 0.

The data was obtained from the analysis of PTEN-GST intact band and protein aggregates features present in three independent HOCl oxidation experiments.

Ranking of modifications with \* is based on maximum FC, highlighted in **bold blue**. Ranking of other modification is based on their position within PTEN structure.

**Supplementary Table 2. Surface accessibility of PTEN residues**

| AA <sup>a</sup> | AA position <sup>b</sup> | RSA <sup>c</sup> | ASA <sup>d</sup> | Z-Score | Class assignment |
|-----------------|--------------------------|------------------|------------------|---------|------------------|
| M               | 1                        | 0.625            | 125.143          | -2.026  | Exposed          |
| T               | 2                        | 0.425            | 58.892           | -0.289  | Exposed          |
| A               | 3                        | 0.495            | 54.582           | -0.833  | Exposed          |
| I               | 4                        | 0.307            | 56.832           | 0.949   | Exposed          |
| I               | 5                        | 0.162            | 30.062           | -0.631  | Buried           |
| K               | 6                        | 0.274            | 56.465           | 0.904   | Buried           |
| E               | 7                        | 0.421            | 73.619           | 0.447   | Exposed          |
| I               | 8                        | 0.103            | 19.073           | 0.663   | Buried           |
| V               | 9                        | 0.098            | 15.124           | -0.324  | Buried           |
| S               | 10                       | 0.416            | 48.708           | -0.458  | Exposed          |
| R               | 11                       | 0.494            | 113.24           | 0.467   | Exposed          |
| N               | 12                       | 0.345            | 50.523           | 0.018   | Exposed          |
| K               | 13                       | 0.441            | 90.631           | -0.405  | Exposed          |

| AA <sup>a</sup> | AA position <sup>b</sup> | Total  | Apolar | Backbone | Sidechain | Ratio (%) | Class assignment |
|-----------------|--------------------------|--------|--------|----------|-----------|-----------|------------------|
| R               | 14                       | 223.13 | 109.05 | 27.57    | 195.57    | 100       | e                |
| R               | 15                       | 105.18 | 39.11  | 7.18     | 98        | 50.1      | e                |
| Y               | 16                       | 102.3  | 64.06  | 4.34     | 97.96     | 50.7      | e                |
| Q               | 17                       | 71.89  | 8.43   | 17.93    | 53.96     | 37.6      | i                |
| E               | 18                       | 31.36  | 10.42  | 9.65     | 21.71     | 15.4      | b                |
| D               | 19                       | 100.54 | 37.05  | 30.35    | 70.19     | 62.1      | e                |
| G               | 20                       | 68.42  | 35.77  | 68.42    | 0         | 78.5      | e                |
| F               | 21                       | 83.85  | 69.03  | 29.11    | 54.74     | 30.4      | i                |
| D               | 22                       | 96.71  | 29.6   | 14.88    | 81.83     | 72.4      | e                |
| L               | 23                       | 13.41  | 13.41  | 1.75     | 11.66     | 8         | b                |
| D               | 24                       | 32.49  | 11.81  | 0.24     | 32.25     | 28.5      | i                |
| L               | 25                       | 0.49   | 0.1    | 0.39     | 0.1       | 0.1       | b                |
| T               | 26                       | 3.44   | 3.44   | 2.02     | 1.42      | 1.3       | b                |
| Y               | 27                       | 39.59  | 38.2   | 1.08     | 38.51     | 19.9      | b                |
| I               | 28                       | 6.52   | 0      | 6.52     | 0         | 0         | b                |
| Y               | 29                       | 36.99  | 36.21  | 5.36     | 31.63     | 16.4      | b                |
| P               | 30                       | 114.09 | 109.51 | 11.45    | 102.64    | 97.6      | e                |
| N               | 31                       | 41.62  | 9.54   | 0.25     | 41.38     | 36.2      | i                |
| I               | 32                       | 5.99   | 5.99   | 0        | 5.99      | 4.1       | b                |
| I               | 33                       | 0      | 0      | 0        | 0         | 0         | b                |
| A               | 34                       | 0      | 0      | 0        | 0         | 0         | b                |
| M               | 35                       | 0      | 0      | 0        | 0         | 0         | b                |
| G               | 36                       | 2.05   | 2.05   | 2.05     | 0         | 2.4       | b                |
| F               | 37                       | 7.1    | 5.07   | 2.05     | 5.05      | 2.8       | b                |
| P               | 38                       | 0      | 0      | 0        | 0         | 0         | b                |
| A               | 39                       | 1.04   | 0.74   | 0.36     | 0.69      | 1.1       | b                |
| E               | 40                       | 93.03  | 29     | 26.3     | 66.72     | 47.3      | i                |

|   |    |        |        |       |        |      |   |
|---|----|--------|--------|-------|--------|------|---|
| R | 41 | 190.84 | 87.36  | 10.07 | 180.77 | 92.5 | e |
| L | 42 | 79.45  | 75.1   | 4.35  | 75.1   | 51.4 | e |
| E | 43 | 123.71 | 46.35  | 13.95 | 109.77 | 77.7 | e |
| G | 44 | 66.83  | 47.58  | 66.83 | 0      | 76.6 | e |
| V | 45 | 91.43  | 83.93  | 14.75 | 76.68  | 62.7 | e |
| Y | 46 | 29.42  | 24.85  | 5.07  | 24.36  | 12.6 | b |
| R | 47 | 180.11 | 74.06  | 15.84 | 164.27 | 84   | e |
| N | 48 | 5.78   | 3.21   | 3.16  | 2.63   | 2.3  | b |
| N | 49 | 59.73  | 5.01   | 0.63  | 59.1   | 51.7 | e |
| I | 50 | 4.56   | 4.56   | 0     | 4.56   | 3.1  | b |
| D | 51 | 64.65  | 14.92  | 1.62  | 63.03  | 55.8 | e |
| D | 52 | 45.27  | 3.52   | 0     | 45.27  | 40.1 | i |
| V | 53 | 0      | 0      | 0     | 0      | 0    | b |
| V | 54 | 23.14  | 23.14  | 0     | 23.14  | 18.9 | b |
| R | 55 | 131.63 | 69.96  | 6.77  | 124.86 | 63.9 | e |
| F | 56 | 0      | 0      | 0     | 0      | 0    | b |
| L | 57 | 0      | 0      | 0     | 0      | 0    | b |
| D | 58 | 45.25  | 27.53  | 5.98  | 39.27  | 34.8 | i |
| S | 59 | 80.59  | 52.74  | 41.11 | 39.48  | 51   | e |
| K | 60 | 97.55  | 63.22  | 29.79 | 67.76  | 41.2 | i |
| H | 61 | 24.44  | 18.04  | 6.48  | 17.97  | 11.6 | b |
| K | 62 | 149.21 | 108.18 | 5.16  | 144.04 | 87.6 | e |
| N | 63 | 92.69  | 35.83  | 9.85  | 82.83  | 72.5 | e |
| H | 64 | 61.27  | 42.64  | 0.07  | 61.2   | 39.6 | i |
| Y | 65 | 1.72   | 0.14   | 1.58  | 0.14   | 0.1  | b |
| K | 66 | 22.24  | 2.34   | 0     | 22.24  | 13.5 | b |
| I | 67 | 0      | 0      | 0     | 0      | 0    | b |
| Y | 68 | 0      | 0      | 0     | 0      | 0    | b |
| N | 69 | 0.49   | 0      | 0.02  | 0.46   | 0.4  | b |
| L | 70 | 0      | 0      | 0     | 0      | 0    | b |
| C | 71 | 5.06   | 0      | 3.39  | 1.66   | 1.6  | b |
| A | 72 | 40.75  | 16.66  | 26.28 | 14.47  | 22.3 | i |
| E | 73 | 80.91  | 45.69  | 30.71 | 50.2   | 35.6 | i |
| R | 74 | 130.96 | 56.78  | 6.42  | 124.54 | 63.7 | e |
| H | 75 | 76.3   | 55.17  | 19.37 | 56.93  | 36.8 | i |
| Y | 76 | 6.69   | 5.9    | 6.69  | 0      | 0    | b |
| D | 77 | 113.28 | 34.01  | 9.09  | 104.2  | 92.2 | e |
| T | 78 | 48.42  | 9.98   | 8.76  | 39.66  | 37.3 | i |
| A | 79 | 84.99  | 66.63  | 34.64 | 50.35  | 77.6 | e |
| K | 80 | 101.7  | 78.35  | 14.97 | 86.73  | 52.7 | e |
| F | 81 | 4.85   | 0      | 4.85  | 0      | 0    | b |
| N | 82 | 90.64  | 30.88  | 15.63 | 75.01  | 65.6 | e |
| C | 83 | 39.95  | 22.13  | 36.7  | 3.24   | 3.2  | b |
| R | 84 | 149.84 | 75.13  | 7.8   | 142.04 | 72.7 | e |
| V | 85 | 8.02   | 3.41   | 4.62  | 3.4    | 2.8  | b |
| A | 86 | 9.48   | 9.48   | 1.63  | 7.85   | 12.1 | b |
| Q | 87 | 94.74  | 16.57  | 21.95 | 72.79  | 50.7 | e |
| Y | 88 | 30.29  | 18.54  | 0.61  | 29.67  | 15.4 | b |
| P | 89 | 67.22  | 54.69  | 12.53 | 54.69  | 52   | e |

|   |     |        |       |       |        |      |   |
|---|-----|--------|-------|-------|--------|------|---|
| F | 90  | 14.04  | 14.04 | 5.68  | 8.35   | 4.6  | b |
| E | 91  | 74.36  | 34.38 | 0.29  | 74.06  | 52.5 | e |
| D | 92  | 54.59  | 24.33 | 8.96  | 45.63  | 40.4 | i |
| H | 93  | 114.36 | 90    | 3.99  | 110.37 | 71.4 | e |
| N | 94  | 23.66  | 2.24  | 0.71  | 22.95  | 20.1 | i |
| P | 95  | 8.23   | 1.27  | 6.97  | 1.27   | 1.2  | b |
| P | 96  | 1.63   | 0.99  | 1.63  | 0      | 0    | b |
| Q | 97  | 97.29  | 22.52 | 2.2   | 95.09  | 66.2 | e |
| L | 98  | 4.54   | 3.5   | 1.04  | 3.5    | 2.4  | b |
| E | 99  | 105.29 | 34.87 | 8.27  | 97.02  | 68.7 | e |
| L | 100 | 41.59  | 41.57 | 3.01  | 38.58  | 26.4 | i |
| I | 101 | 0.31   | 0.31  | 0     | 0.31   | 0.2  | b |
| K | 102 | 96.77  | 73.04 | 0.03  | 96.73  | 58.8 | e |
| P | 103 | 62.95  | 60.57 | 4.2   | 58.75  | 55.8 | e |
| F | 104 | 0      | 0     | 0     | 0      | 0    | b |
| C | 105 | 0      | 0     | 0     | 0      | 0    | b |
| E | 106 | 76.23  | 30.42 | 4.36  | 71.87  | 50.9 | e |
| D | 107 | 32.68  | 16.81 | 10.04 | 22.64  | 20   | i |
| L | 108 | 0      | 0     | 0     | 0      | 0    | b |
| D | 109 | 41.6   | 0.35  | 0.13  | 41.47  | 36.7 | i |
| Q | 110 | 93.42  | 34.86 | 2.28  | 91.14  | 63.4 | e |
| W | 111 | 24.48  | 24.48 | 0     | 24.48  | 10.9 | b |
| L | 112 | 18.33  | 7.22  | 11.12 | 7.22   | 4.9  | b |
| S | 113 | 70.47  | 51.28 | 29.25 | 41.22  | 53.3 | e |
| E | 114 | 108.9  | 61.82 | 22.8  | 86.1   | 61   | e |
| D | 115 | 62.26  | 25.98 | 38.04 | 24.22  | 21.4 | i |
| D | 116 | 93.7   | 18.6  | 33.31 | 60.39  | 53.4 | e |
| N | 117 | 25.01  | 2.72  | 2.72  | 22.29  | 19.5 | b |
| H | 118 | 68.86  | 55.41 | 0     | 68.86  | 44.5 | i |
| V | 119 | 6.42   | 6.42  | 0     | 6.42   | 5.2  | b |
| A | 120 | 0      | 0     | 0     | 0      | 0    | b |
| A | 121 | 0.01   | 0.01  | 0     | 0.01   | 0    | b |
| I | 122 | 0      | 0     | 0     | 0      | 0    | b |
| H | 123 | 0      | 0     | 0     | 0      | 0    | b |
| C | 124 | 4.86   | 0     | 0     | 4.86   | 4.8  | b |
| K | 125 | 39.52  | 17.97 | 2.61  | 36.9   | 22.4 | i |
| A | 126 | 46.97  | 40.96 | 8.24  | 38.73  | 59.7 | e |
| G | 127 | 1.19   | 0     | 1.19  | 0      | 1.4  | b |
| K | 128 | 87.8   | 83.55 | 0.27  | 87.53  | 53.2 | e |
| G | 129 | 10.09  | 8.85  | 10.09 | 0      | 11.6 | b |
| R | 130 | 7.19   | 3.11  | 0.56  | 6.63   | 3.4  | b |
| T | 131 | 0      | 0     | 0     | 0      | 0    | b |
| G | 132 | 0      | 0     | 0     | 0      | 0    | b |
| V | 133 | 0      | 0     | 0     | 0      | 0    | b |
| M | 134 | 0      | 0     | 0     | 0      | 0    | b |
| I | 135 | 0      | 0     | 0     | 0      | 0    | b |
| C | 136 | 0      | 0     | 0     | 0      | 0    | b |
| A | 137 | 0      | 0     | 0     | 0      | 0    | b |
| Y | 138 | 6.39   | 2.45  | 0     | 6.39   | 3.3  | b |

|   |     |        |        |       |        |      |   |
|---|-----|--------|--------|-------|--------|------|---|
| L | 139 | 1.95   | 1.95   | 0     | 1.95   | 1.3  | b |
| L | 140 | 10.76  | 1.63   | 9.16  | 1.6    | 1.1  | b |
| H | 141 | 48.45  | 23.73  | 18.54 | 29.9   | 19.3 | b |
| R | 142 | 146.16 | 39.7   | 19    | 127.16 | 65   | e |
| G | 143 | 42.16  | 22.98  | 42.16 | 0      | 48.3 | i |
| K | 144 | 117.6  | 65.86  | 19.52 | 98.08  | 59.6 | e |
| F | 145 | 37.9   | 37.78  | 1.95  | 35.95  | 20   | b |
| L | 146 | 136.85 | 129.59 | 9.16  | 127.68 | 87.3 | e |
| K | 147 | 126.69 | 90.14  | 2.03  | 124.66 | 75.8 | e |
| A | 148 | 3      | 2.12   | 0.88  | 2.12   | 3.3  | b |
| Q | 149 | 100.77 | 22.34  | 0.15  | 100.62 | 70   | e |
| E | 150 | 67.68  | 36.32  | 9.44  | 58.24  | 41.2 | i |
| A | 151 | 0      | 0      | 0     | 0      | 0    | b |
| L | 152 | 4.47   | 0.39   | 4.08  | 0.39   | 0.3  | b |
| D | 153 | 70.53  | 26.32  | 7.95  | 62.58  | 55.4 | e |
| F | 154 | 57.22  | 57.22  | 3.13  | 54.08  | 30   | i |
| Y | 155 | 0      | 0      | 0     | 0      | 0    | b |
| G | 156 | 2.47   | 2.47   | 2.47  | 0      | 2.8  | b |
| E | 157 | 77.34  | 15.54  | 0.89  | 76.45  | 54.1 | e |
| V | 158 | 28.45  | 28.45  | 0.98  | 27.46  | 22.5 | i |
| R | 159 | 10.17  | 5.49   | 0.26  | 9.91   | 5.1  | b |
| T | 160 | 12.67  | 12.42  | 0.25  | 12.42  | 11.7 | b |
| R | 161 | 139.76 | 62.73  | 28.98 | 110.77 | 56.7 | e |
| D | 162 | 73.48  | 38.8   | 15.77 | 57.71  | 51.1 | e |
| K | 163 | 145.82 | 88.33  | 21    | 124.82 | 75.9 | e |
| K | 164 | 113.69 | 74.64  | 0.85  | 112.83 | 68.6 | e |
| G | 165 | 3.34   | 1.07   | 3.34  | 0      | 3.8  | b |
| V | 166 | 3.44   | 0.18   | 3.26  | 0.18   | 0.1  | b |
| T | 167 | 37.46  | 25.66  | 8.36  | 29.1   | 27.4 | i |
| I | 168 | 30.2   | 30.2   | 0.32  | 29.88  | 20.3 | i |
| P | 169 | 11.56  | 10.55  | 1.63  | 9.93   | 9.4  | b |
| S | 170 | 0.09   | 0.09   | 0     | 0.09   | 0.1  | b |
| Q | 171 | 0.57   | 0      | 0     | 0.57   | 0.4  | b |
| R | 172 | 60.97  | 32.48  | 0     | 60.97  | 31.2 | i |
| R | 173 | 30.38  | 21.53  | 6.45  | 23.93  | 12.2 | b |
| Y | 174 | 0.07   | 0.07   | 0     | 0.07   | 0    | b |
| V | 175 | 0      | 0      | 0     | 0      | 0    | b |
| Y | 176 | 94.9   | 84.79  | 2.61  | 92.29  | 47.8 | i |
| Y | 177 | 20.92  | 18.76  | 0.51  | 20.41  | 10.6 | b |
| Y | 178 | 3.86   | 2.91   | 0     | 3.86   | 2    | b |
| S | 179 | 5.63   | 3.11   | 1.16  | 4.48   | 5.8  | b |
| Y | 180 | 98.71  | 64.47  | 1.15  | 97.56  | 50.5 | e |
| L | 181 | 9.01   | 8.7    | 0.31  | 8.7    | 6    | b |
| L | 182 | 54.31  | 51.04  | 6.95  | 47.36  | 32.4 | i |
| K | 183 | 125.09 | 95.21  | 27.32 | 97.77  | 59.4 | e |
| N | 184 | 60.66  | 13.56  | 21.21 | 39.45  | 34.5 | i |
| H | 185 | 161.65 | 119.85 | 29.09 | 132.57 | 85.7 | e |



|   |     |        |        |       |        |      |   |
|---|-----|--------|--------|-------|--------|------|---|
| L | 186 | 77.61  | 68.27  | 13.53 | 64.08  | 43.8 | i |
| D | 187 | 108.01 | 34.38  | 10.3  | 97.71  | 86.5 | e |
| Y | 188 | 34.36  | 15.26  | 16.25 | 18.1   | 9.4  | b |
| R | 189 | 170.47 | 75.89  | 1.14  | 169.33 | 86.6 | e |
| P | 190 | 95.65  | 78.22  | 17.43 | 78.22  | 74.4 | e |
| V | 191 | 42.89  | 42.89  | 3.7   | 39.19  | 32   | i |
| A | 192 | 47.41  | 42.12  | 5.29  | 42.12  | 64.9 | e |
| L | 193 | 0.31   | 0.04   | 0.27  | 0.04   | 0    | b |
| L | 194 | 53.88  | 53.88  | 0     | 53.88  | 36.9 | i |
| F | 195 | 0.14   | 0.14   | 0     | 0.14   | 0.1  | b |
| H | 196 | 43.72  | 28.36  | 5.24  | 38.48  | 24.9 | i |
| K | 197 | 31.65  | 8.29   | 0     | 31.65  | 19.2 | b |
| M | 198 | 0      | 0      | 0     | 0      | 0    | b |
| M | 199 | 18.13  | 18.13  | 0     | 18.13  | 11.5 | b |
| F | 200 | 0      | 0      | 0     | 0      | 0    | b |
| E | 201 | 41.55  | 7.94   | 1.09  | 40.46  | 28.7 | i |
| T | 202 | 31.35  | 30.8   | 0.01  | 31.34  | 29.5 | i |
| I | 203 | 21.94  | 15.83  | 6.28  | 15.66  | 10.6 | b |
| P | 204 | 0.12   | 0.12   | 0.12  | 0      | 0    | b |
| M | 205 | 63.81  | 58.97  | 5.15  | 58.66  | 37.1 | i |
| F | 206 | 38.11  | 14.14  | 28.34 | 9.77   | 5.4  | b |
| S | 207 | 42.26  | 18.31  | 15.74 | 26.52  | 34.3 | i |
| G | 208 | 85.78  | 57.06  | 85.78 | 0      | 98.4 | e |
| G | 209 | 46.34  | 33.65  | 46.34 | 0      | 53.1 | e |
| T | 210 | 54.49  | 34.95  | 0     | 54.49  | 51.3 | e |
| C | 211 | 7.6    | 0.82   | 7.6   | 0      | 0    | b |
| N | 212 | 65.84  | 6.51   | 0.97  | 64.88  | 56.8 | e |
| P | 213 | 0.19   | 0.07   | 0.12  | 0.07   | 0.1  | b |
| Q | 214 | 9.5    | 1.03   | 0.37  | 9.13   | 6.4  | b |
| F | 215 | 5.56   | 5.56   | 0     | 5.56   | 3.1  | b |
| V | 216 | 29.15  | 28.47  | 0.67  | 28.47  | 23.3 | i |
| V | 217 | 0      | 0      | 0     | 0      | 0    | b |
| C | 218 | 24.08  | 1.52   | 0     | 24.08  | 23.5 | i |
| Q | 219 | 43.93  | 3.08   | 0.27  | 43.66  | 30.4 | i |
| L | 220 | 84.89  | 82.82  | 4.89  | 80.01  | 54.7 | e |
| K | 221 | 176.37 | 110.59 | 33.3  | 143.07 | 87   | e |
| V | 222 | 98.18  | 98.18  | 3.69  | 94.49  | 77.3 | e |
| K | 223 | 149.85 | 91.3   | 14.21 | 135.64 | 82.5 | e |
| I | 224 | 60.44  | 38.19  | 30.15 | 30.3   | 20.6 | i |
| Y | 225 | 54.73  | 40.95  | 7.04  | 47.68  | 24.7 | i |
| S | 226 | 72.4   | 33.67  | 19.86 | 52.54  | 67.9 | e |
| S | 227 | 15.64  | 8.81   | 8.83  | 6.81   | 8.8  | b |
| N | 228 | 119.12 | 58.93  | 17.07 | 102.06 | 89.3 | e |
| S | 229 | 52.02  | 34.19  | 13.83 | 38.19  | 49.3 | i |
| G | 230 | 22.46  | 16.76  | 22.46 | 0      | 25.8 | i |
| P | 231 | 35.5   | 17.43  | 18.09 | 17.41  | 16.6 | b |
| T | 232 | 78.82  | 51.97  | 39.9  | 38.92  | 36.6 | i |
| R | 233 | 105.48 | 73.5   | 7.64  | 97.84  | 50   | e |
| R | 234 | 114.6  | 52.15  | 24.05 | 90.55  | 46.3 | i |

|   |     |        |        |       |        |      |   |
|---|-----|--------|--------|-------|--------|------|---|
| E | 235 | 79.99  | 45.32  | 9.1   | 70.89  | 50.2 | e |
| D | 236 | 99.17  | 43.85  | 9.63  | 89.54  | 79.2 | e |
| K | 237 | 127.61 | 87     | 0.71  | 126.89 | 77.1 | e |
| F | 238 | 59.52  | 59.52  | 0     | 59.52  | 33   | i |
| M | 239 | 4.7    | 4.7    | 0     | 4.7    | 3    | b |
| Y | 240 | 22.78  | 8.63   | 0     | 22.78  | 11.8 | b |
| F | 241 | 2.78   | 2.68   | 0.41  | 2.37   | 1.3  | b |
| E | 242 | 66.83  | 18.59  | 8.05  | 58.78  | 41.6 | i |
| F | 243 | 12.82  | 1.18   | 11.81 | 1.01   | 0.6  | b |
| P | 244 | 98.74  | 78.59  | 34.67 | 64.07  | 60.9 | e |
| Q | 245 | 128.06 | 68.32  | 4.61  | 123.45 | 85.9 | e |
| P | 246 | 62.79  | 55.68  | 7.42  | 55.37  | 52.6 | e |
| L | 247 | 13.06  | 13.06  | 2.38  | 10.69  | 7.3  | b |
| P | 248 | 95.59  | 92.37  | 3.23  | 92.36  | 87.8 | e |
| V | 249 | 2.76   | 1.98   | 2.76  | 0      | 0    | b |
| C | 250 | 42.32  | 18.24  | 7.29  | 35.03  | 34.2 | i |
| G | 251 | 13.53  | 13.53  | 13.53 | 0      | 15.5 | b |
| D | 252 | 10.06  | 1.15   | 1.5   | 8.56   | 7.6  | b |
| I | 253 | 3.43   | 3.43   | 0     | 3.43   | 2.3  | b |
| K | 254 | 43.04  | 9.36   | 0.02  | 43.03  | 26.2 | i |
| V | 255 | 0.36   | 0.36   | 0     | 0.36   | 0.3  | b |
| E | 256 | 27.29  | 2.09   | 0     | 27.29  | 19.3 | b |
| F | 257 | 0.03   | 0      | 0.03  | 0      | 0    | b |
| F | 258 | 21.21  | 21.21  | 0     | 21.21  | 11.8 | b |
| H | 259 | 0.47   | 0.47   | 0     | 0.47   | 0.3  | b |
| K | 260 | 66.99  | 47.95  | 3.55  | 63.44  | 38.6 | i |
| Q | 261 | 44.34  | 14.74  | 6.61  | 37.73  | 26.3 | i |
| N | 262 | 92.57  | 43.07  | 15.02 | 77.55  | 67.8 | e |
| K | 263 | 195.49 | 141.34 | 36.12 | 159.38 | 96.9 | e |
| M | 264 | 111.29 | 99     | 21.23 | 90.07  | 56.9 | e |
| L | 265 | 190.76 | 171.01 | 27.66 | 163.11 | 100  | e |
| K | 266 | 134.4  | 94.91  | 14.2  | 120.2  | 73.1 | e |
| K | 267 | 78.71  | 25.7   | 14.03 | 64.69  | 39.3 | i |
| D | 268 | 60.14  | 18.07  | 5.85  | 54.29  | 48   | i |
| K | 269 | 97.57  | 84.55  | 4     | 93.57  | 56.9 | e |
| M | 270 | 0.62   | 0      | 0.62  | 0      | 0    | b |
| F | 271 | 0.6    | 0.48   | 0.6   | 0      | 0    | b |
| H | 272 | 31.53  | 18.71  | 0     | 31.53  | 20.4 | i |
| F | 273 | 0.79   | 0.79   | 0     | 0.79   | 0.4  | b |
| W | 274 | 25.58  | 24.98  | 0     | 25.58  | 11.4 | b |
| V | 275 | 2.74   | 2.74   | 0     | 2.74   | 2.2  | b |
| N | 276 | 0.43   | 0      | 0     | 0.43   | 0.4  | b |
| T | 277 | 0.19   | 0.19   | 0     | 0.19   | 0.2  | b |
| F | 278 | 32.44  | 24.88  | 7.55  | 24.88  | 13.8 | b |
| F | 279 | 29.9   | 12.19  | 20.48 | 9.42   | 5.2  | b |
| I | 280 | 18.35  | 1.08   | 17.35 | 1      | 0.7  | b |
| P | 281 | 82.58  | 54.28  | 54.76 | 27.82  | 26.4 | i |
| G | 282 | 247.54 | 161.65 | 67.66 | 179.88 | 100  | e |
| P | 283 | 146.54 | 44.25  | 40.34 | 106.19 | 75.2 | e |

|   |     |        |        |       |        |      |   |
|---|-----|--------|--------|-------|--------|------|---|
| E | 284 | 59.77  | 21.64  | 15.01 | 44.76  | 23.2 | i |
| E | 285 | 33.8   | 33.8   | 10.43 | 23.38  | 16   | b |
| T | 286 | 69.58  | 41.97  | 27.62 | 41.95  | 34.3 | i |
| S | 287 | 43.54  | 43.54  | 1.9   | 41.64  | 28.5 | i |
| E | 288 | 59.02  | 20.1   | 14.3  | 44.71  | 42.1 | i |
| K | 289 | 8.46   | 8.46   | 0     | 8.46   | 5.8  | b |
| V | 290 | 48.32  | 44.23  | 0     | 48.32  | 45.5 | i |
| E | 291 | 15.32  | 14.57  | 0.02  | 15.3   | 9.3  | b |
| N | 292 | 103.91 | 28.56  | 9.41  | 94.5   | 82.7 | e |
| G | 293 | 49.68  | 5.6    | 2.07  | 47.61  | 42.1 | i |
| S | 294 | 0      | 0      | 0     | 0      | 0    | b |
| L | 295 | 10.16  | 1.69   | 8.03  | 2.13   | 1.9  | b |
| C | 296 | 98.62  | 75.72  | 5.24  | 93.38  | 56.8 | e |
| D | 297 | 1.25   | 1.25   | 1.25  | 0      | 0    | b |
| Q | 298 | 13.14  | 4.49   | 1.88  | 11.26  | 9.9  | b |
| E | 299 | 116.76 | 67.96  | 17.26 | 99.5   | 60.5 | e |
| I | 300 | 18.34  | 14.86  | 9.11  | 9.23   | 8.2  | b |
| D | 301 | 146.01 | 109.15 | 20.17 | 125.83 | 76.5 | e |
| S | 302 | 77.13  | 65.55  | 27.15 | 49.99  | 77   | e |
| I | 303 | 59.06  | 13.63  | 11.78 | 47.28  | 41.4 | i |
| C | 304 | 168.36 | 64.7   | 13.78 | 154.58 | 79.1 | e |
| S | 305 | 107.27 | 66.86  | 0     | 107.27 | 55.6 | e |
| I | 306 | 2.83   | 2.83   | 0.37  | 2.45   | 1.4  | b |
| E | 307 | 29.93  | 28.64  | 0.47  | 29.46  | 38.1 | i |
| R | 308 | 74.31  | 74.31  | 4.09  | 70.22  | 66.8 | e |
| A | 309 | 103.17 | 25.6   | 15.38 | 87.79  | 76.8 | e |

| AA <sup>a</sup> | AA position <sup>b</sup> | RSA <sup>c</sup> | ASA <sup>d</sup> | Z-Score | Class assignment <sup>e</sup> |
|-----------------|--------------------------|------------------|------------------|---------|-------------------------------|
| D               | 310                      | 0.424            | 61.026           | -1.278  | Exposed                       |
| N               | 311                      | 0.44             | 64.401           | -2.283  | Exposed                       |
| D               | 312                      | 0.369            | 53.216           | -2.157  | Exposed                       |
| K               | 313                      | 0.277            | 56.897           | -1.363  | Buried                        |
| E               | 314                      | 0.316            | 55.258           | -1.470  | Exposed                       |
| Y               | 315                      | 0.177            | 37.932           | 0.048   | Buried                        |
| L               | 316                      | 0.092            | 16.809           | -0.174  | Buried                        |
| V               | 317                      | 0.097            | 14.863           | 0.417   | Buried                        |
| L               | 318                      | 0.041            | 7.58             | -0.148  | Buried                        |
| T               | 319                      | 0.273            | 37.851           | 0.733   | Exposed                       |
| L               | 320                      | 0.031            | 5.694            | 0.612   | Buried                        |
| T               | 321                      | 0.403            | 55.868           | 0.548   | Exposed                       |
| K               | 322                      | 0.227            | 46.714           | 0.052   | Buried                        |
| N               | 323                      | 0.517            | 75.689           | -0.953  | Exposed                       |
| D               | 324                      | 0.391            | 56.386           | -0.797  | Exposed                       |
| L               | 325                      | 0.098            | 17.999           | -0.515  | Buried                        |
| D               | 326                      | 0.193            | 27.811           | -0.911  | Buried                        |
| K               | 327                      | 0.62             | 127.616          | -0.058  | Exposed                       |
| A               | 328                      | 0.316            | 34.867           | -1.196  | Exposed                       |
| N               | 329                      | 0.274            | 40.172           | -0.312  | Buried                        |

|   |     |       |         |        |         |
|---|-----|-------|---------|--------|---------|
| K | 330 | 0.555 | 114.122 | -0.170 | Exposed |
| D | 331 | 0.508 | 73.26   | -0.896 | Exposed |
| K | 332 | 0.59  | 121.363 | 0.184  | Exposed |
| A | 333 | 0.546 | 60.202  | 0.237  | Exposed |
| N | 334 | 0.309 | 45.238  | 0.043  | Exposed |
| R | 335 | 0.682 | 156.178 | 0.613  | Exposed |
| Y | 336 | 0.332 | 71.034  | 0.663  | Exposed |
| F | 337 | 0.061 | 12.323  | 0.919  | Buried  |
| S | 338 | 0.319 | 37.363  | 0.887  | Exposed |
| P | 339 | 0.758 | 107.503 | -0.106 | Exposed |
| N | 340 | 0.63  | 92.217  | 0.415  | Exposed |
| F | 341 | 0.043 | 8.59    | -0.172 | Buried  |
| K | 342 | 0.427 | 87.875  | 1.712  | Exposed |
| V | 343 | 0.052 | 7.962   | 0.22   | Buried  |
| K | 344 | 0.192 | 39.556  | 0.917  | Buried  |
| L | 345 | 0.066 | 12.14   | 0.321  | Buried  |
| Y | 346 | 0.16  | 34.256  | 0.832  | Buried  |
| F | 347 | 0.043 | 8.65    | -0.603 | Buried  |
| T | 348 | 0.333 | 46.187  | 0.269  | Exposed |
| K | 349 | 0.555 | 114.225 | 0.06   | Exposed |
| T | 350 | 0.209 | 29.058  | 0.074  | Buried  |
| V | 351 | 0.433 | 66.475  | -0.384 | Exposed |
| E | 352 | 0.563 | 98.286  | -0.035 | Exposed |
| E | 353 | 0.622 | 108.646 | 0.17   | Exposed |
| P | 354 | 0.262 | 37.22   | -0.597 | Exposed |
| S | 355 | 0.67  | 78.524  | 0.089  | Exposed |
| N | 356 | 0.578 | 84.605  | -0.571 | Exposed |
| P | 357 | 0.491 | 69.687  | -1.625 | Exposed |
| E | 358 | 0.708 | 123.757 | -0.558 | Exposed |
| A | 359 | 0.272 | 29.93   | -0.330 | Buried  |
| S | 360 | 0.536 | 62.772  | -0.547 | Exposed |
| S | 361 | 0.62  | 72.711  | -1.781 | Exposed |
| S | 362 | 0.462 | 54.1    | -0.984 | Exposed |
| T | 363 | 0.543 | 75.342  | -0.723 | Exposed |
| S | 364 | 0.615 | 72.031  | -0.832 | Exposed |
| V | 365 | 0.276 | 42.452  | -0.380 | Exposed |
| T | 366 | 0.484 | 67.089  | -0.052 | Exposed |
| P | 367 | 0.405 | 57.498  | -1.305 | Exposed |
| D | 368 | 0.566 | 81.546  | -1.095 | Exposed |
| V | 369 | 0.324 | 49.799  | -0.405 | Exposed |
| S | 370 | 0.37  | 43.329  | -0.989 | Exposed |
| D | 371 | 0.625 | 90.077  | -1.035 | Exposed |
| N | 372 | 0.623 | 91.163  | -1.923 | Exposed |
| E | 373 | 0.534 | 93.22   | -0.386 | Exposed |
| P | 374 | 0.287 | 40.754  | -1.197 | Buried  |
| D | 375 | 0.54  | 77.785  | -1.074 | Exposed |
| H | 376 | 0.345 | 62.701  | -0.945 | Exposed |
| Y | 377 | 0.325 | 69.41   | -1.253 | Exposed |
| R | 378 | 0.612 | 140.217 | -0.378 | Exposed |

|   |     |       |         |        |         |
|---|-----|-------|---------|--------|---------|
| Y | 379 | 0.419 | 89.626  | -1.669 | Exposed |
| S | 380 | 0.434 | 50.877  | -1.696 | Exposed |
| D | 381 | 0.652 | 93.939  | -1.746 | Exposed |
| T | 382 | 0.386 | 53.483  | -0.547 | Exposed |
| T | 383 | 0.484 | 67.145  | -2.135 | Exposed |
| D | 384 | 0.651 | 93.751  | -1.375 | Exposed |
| S | 385 | 0.577 | 67.624  | -1.643 | Exposed |
| D | 386 | 0.411 | 59.153  | -0.394 | Exposed |
| P | 387 | 0.446 | 63.231  | -0.994 | Exposed |
| E | 388 | 0.595 | 103.859 | -0.758 | Exposed |
| N | 389 | 0.644 | 94.34   | -0.928 | Exposed |
| E | 390 | 0.422 | 73.776  | -0.732 | Exposed |
| P | 391 | 0.604 | 85.651  | -1.141 | Exposed |
| F | 392 | 0.368 | 73.898  | -1.544 | Exposed |
| D | 393 | 0.403 | 58.043  | -0.967 | Exposed |
| E | 394 | 0.475 | 82.948  | -2.052 | Exposed |
| D | 395 | 0.472 | 68.087  | -1.271 | Exposed |
| Q | 396 | 0.289 | 51.633  | -0.103 | Buried  |
| H | 397 | 0.241 | 43.82   | 0.088  | Buried  |
| T | 398 | 0.166 | 23.094  | -0.150 | Buried  |
| Q | 399 | 0.452 | 80.799  | 0.882  | Exposed |
| I | 400 | 0.129 | 23.958  | -0.236 | Buried  |
| T | 401 | 0.479 | 66.465  | 0.851  | Exposed |
| K | 402 | 0.562 | 115.645 | 0.516  | Exposed |
| V | 403 | 0.68  | 104.455 | -0.634 | Exposed |

a AA=Amino acid. Residues 1-13 and the C-terminal tail (residue 352 onwards) are disordered in the crystal structure so for this region NetsurfP (ver. 1.1) (<http://www.cbs.dtu.dk/services/NetSurfP>) was used to predict solvent accessibility of PTEN residues using the PTEN FASTA sequence obtained from Uniprot [36]. Class assignment was predicted using a threshold of 50 exposed accessible surface area, based on the Absolute Solvent Accessibility<sub>max</sub> of a given amino acid. For Residues 14-351, class assignment was predicted using GETAREA with a probe diameter of 1.4Å (equivalent to water) and the 1d5r.pdb 3D-data file from the PDB database. The higher the ratio the more solvent accessible the residue. Ratios <20 are considered buried and >50 exposed. Intermediate values show some solvent accessibility.

b Amino acid position

c RSA= Relative Surface Accessibility

d ASA= Absolute Solvent Accessibility
